# Supplementary material for: Comparison of the effects of synthesis methods of B, N, S, and P-doped carbon dots with high photoluminescence properties on HeLa tumor cells
Source: Royal Society of Chemistry journal article supplement (doi:10.1039/d0ra09403j), 2021-01-01
Supplement: d0ra09403j1.pdf [file d0ra09403j1.pdf]

## Supporting information

### Comparison method effect on synthesise B, N, S, and P-doped carbon dots with high photoluminescence property on HeLa tumor cells

Aswandi Wibrianto<sup>a</sup>, Siti Q. Khairunisa<sup>b</sup>, Satya C. W. Sakti<sup>a,c</sup>, Yatim L. Ni'mah<sup>d</sup>, Bambang Purwanto<sup>e</sup> and Mochamad Z. Fahmi<sup>\*a,c</sup>

*<sup>a</sup>Department of Chemistry, Universitas Airlangga, Surabaya 61115, Indonesia.*

*<sup>b</sup>Institute of Tropical Disease, Universitas Airlangga, Surabaya 60115, Indonesia.*

*<sup>c</sup>Supramodification Nano-Micro Engineering Research Group, Universitas Airlangga, Surabaya 60115, Indonesia*

*<sup>d</sup>Department of Chemistry, Faculty of Science and Data Analytics, Sepuluh Nopember Institute of Technology, Keputih, Sukolilo, Surabaya 60111, Indonesia*

*<sup>e</sup>Department of Physiology, Department of Medical Biochemistry, Faculty of Medicine, Universitas Airlangga, Surabaya 60131, Indonesia*

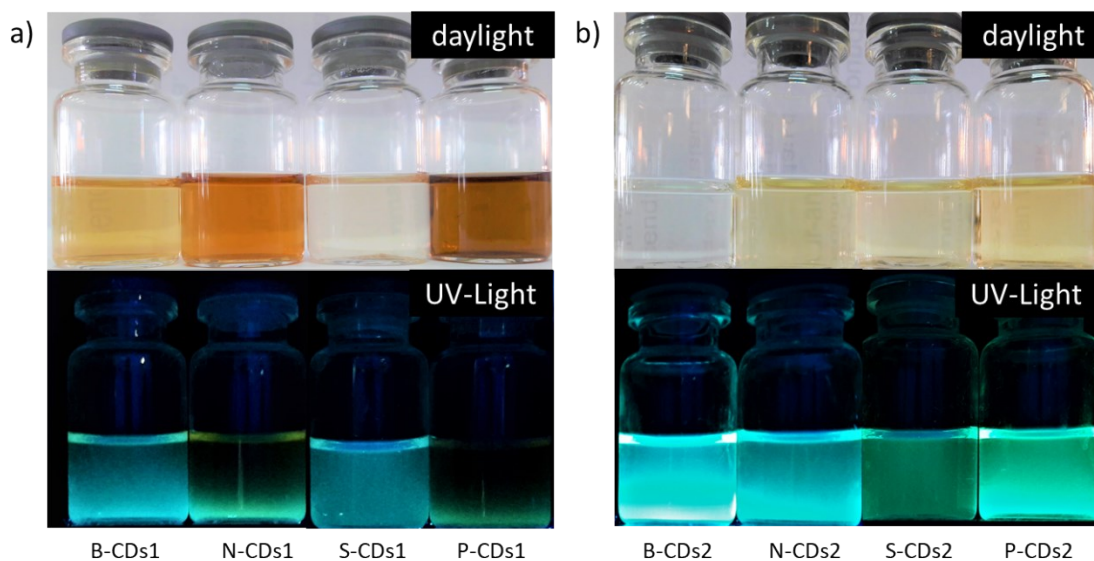

**Fig S1** Photographs of doped CDs under daylight and UV-light prepared by Furnace assisted (a) and Microwave assisted (b) methods.

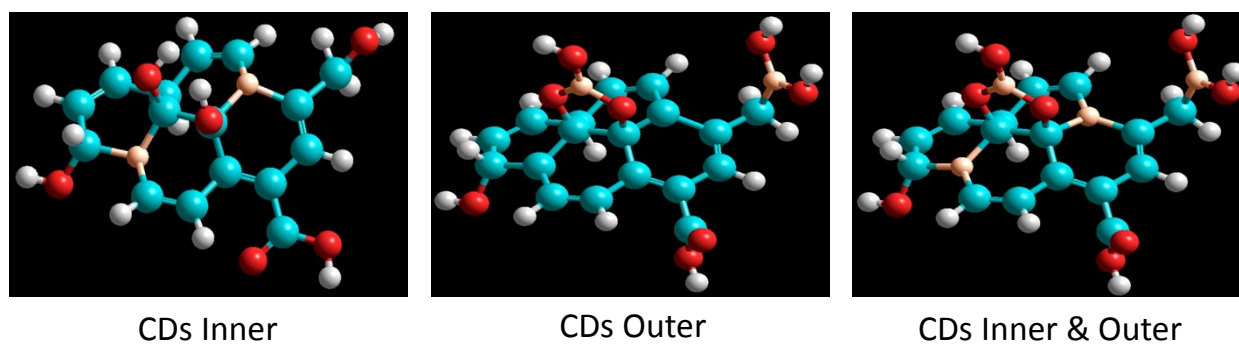

**Fig. S2** Molecular structure of Pyrene doped with Boron, Nitrogen, Sulphur, and Phosphorus on inner structure (CDs Inner), outer structure (CDs Outer), and its compilation (CDs Inner & outer). The white, red, cyan and orange ball represent of Hydrogen, Oxygen, Carbon and doping atom positions, respectively.

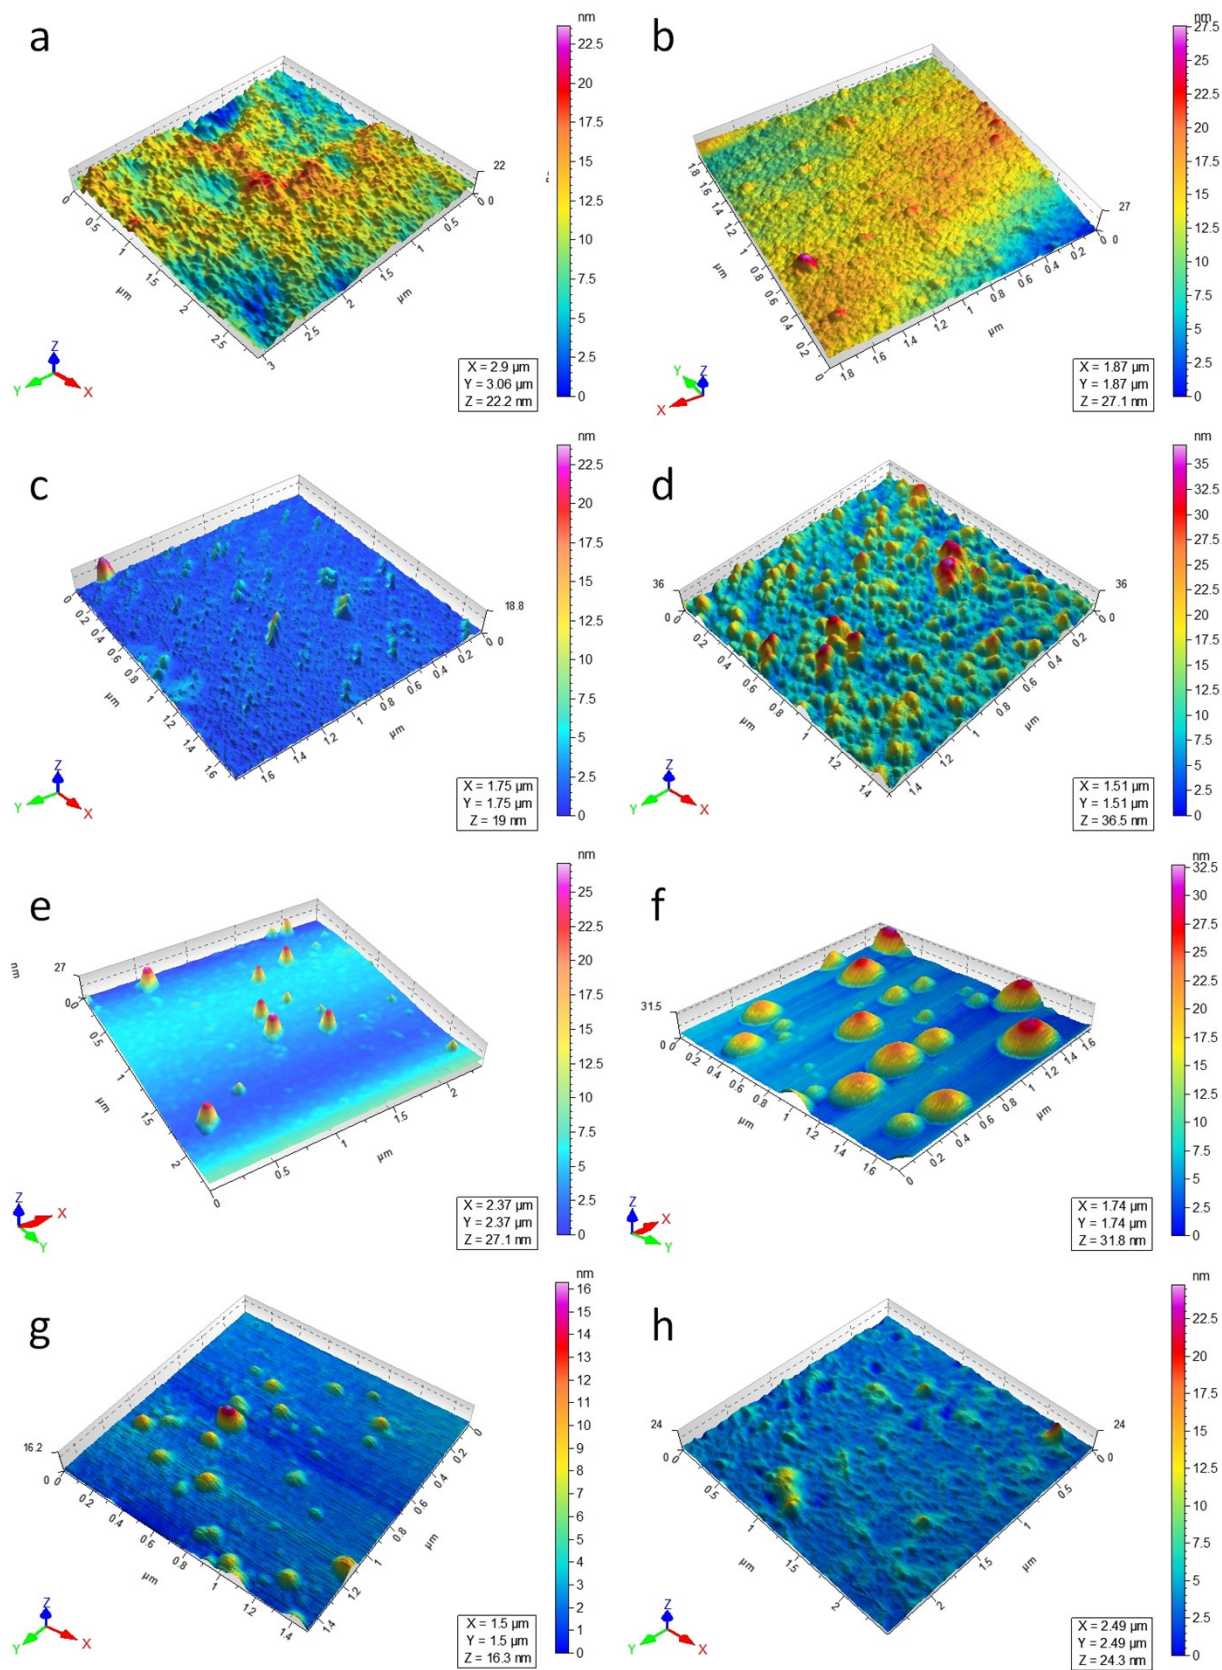

**Fig. S3** AFM 3D topography images of **a** B-CDs1, **b** N-CDs1, **c** S-CDs1, **d** P-CDs1, **e** B-CDs2, **f** N-CDs2, **g** S-CDs2, and **h** P-CDs2.

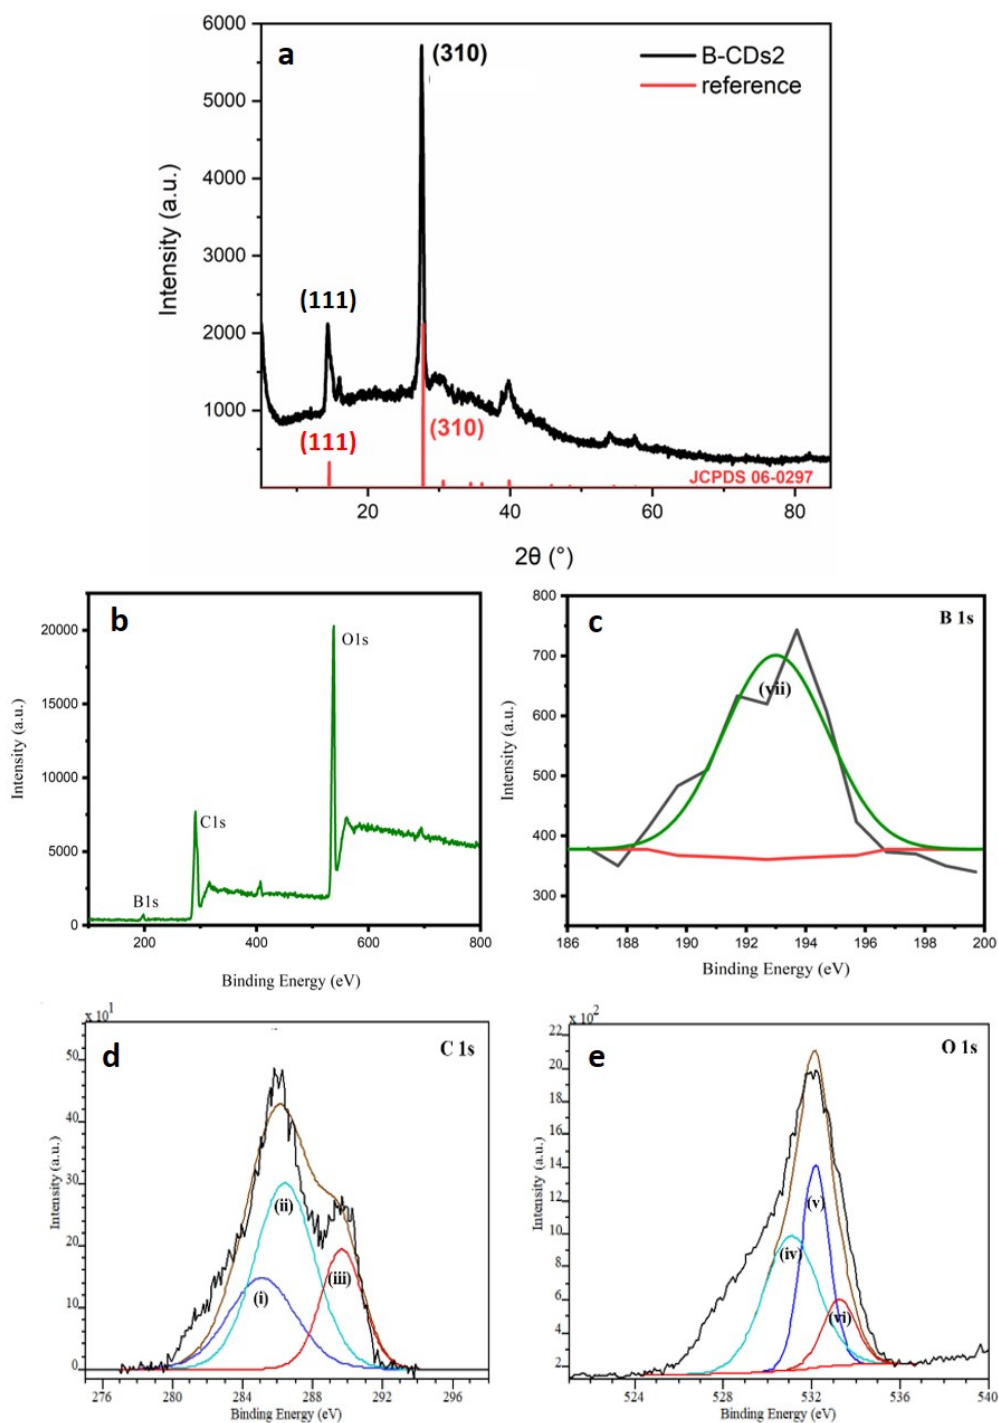

**Fig. S4** a XRD diffractogram of B-CDs2 doped-carbon dots. B-CDs2 carbon dots XPS Spectra at **b** whole spectrum, **c** B 1s, **d** C 1s, and **e** O 1s regions.



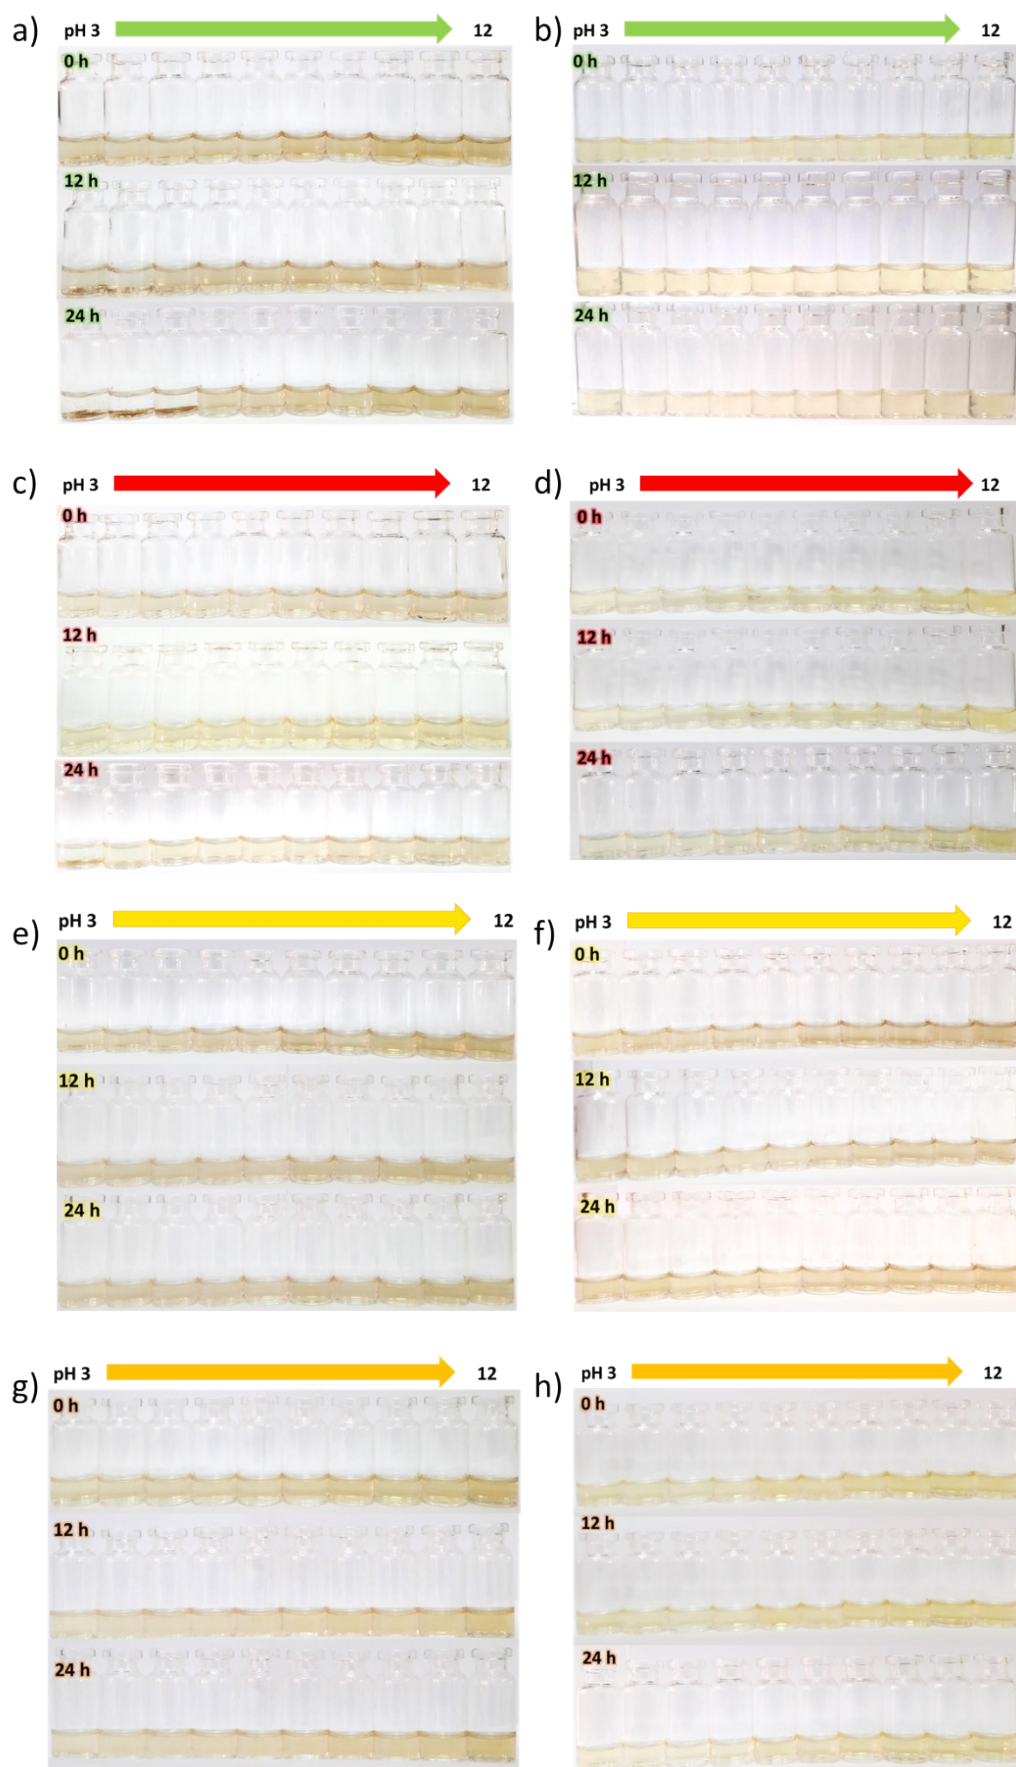

**Fig. S5** Stability images of (a) B-CDs1, (b) B-CDs2, (c) N-CDs1, (d) N-CDs2, (e) S-CDs1, (f) S-CDs2, (g) P-CDs1, and (h) P-CDs2 at varied pH conditions.

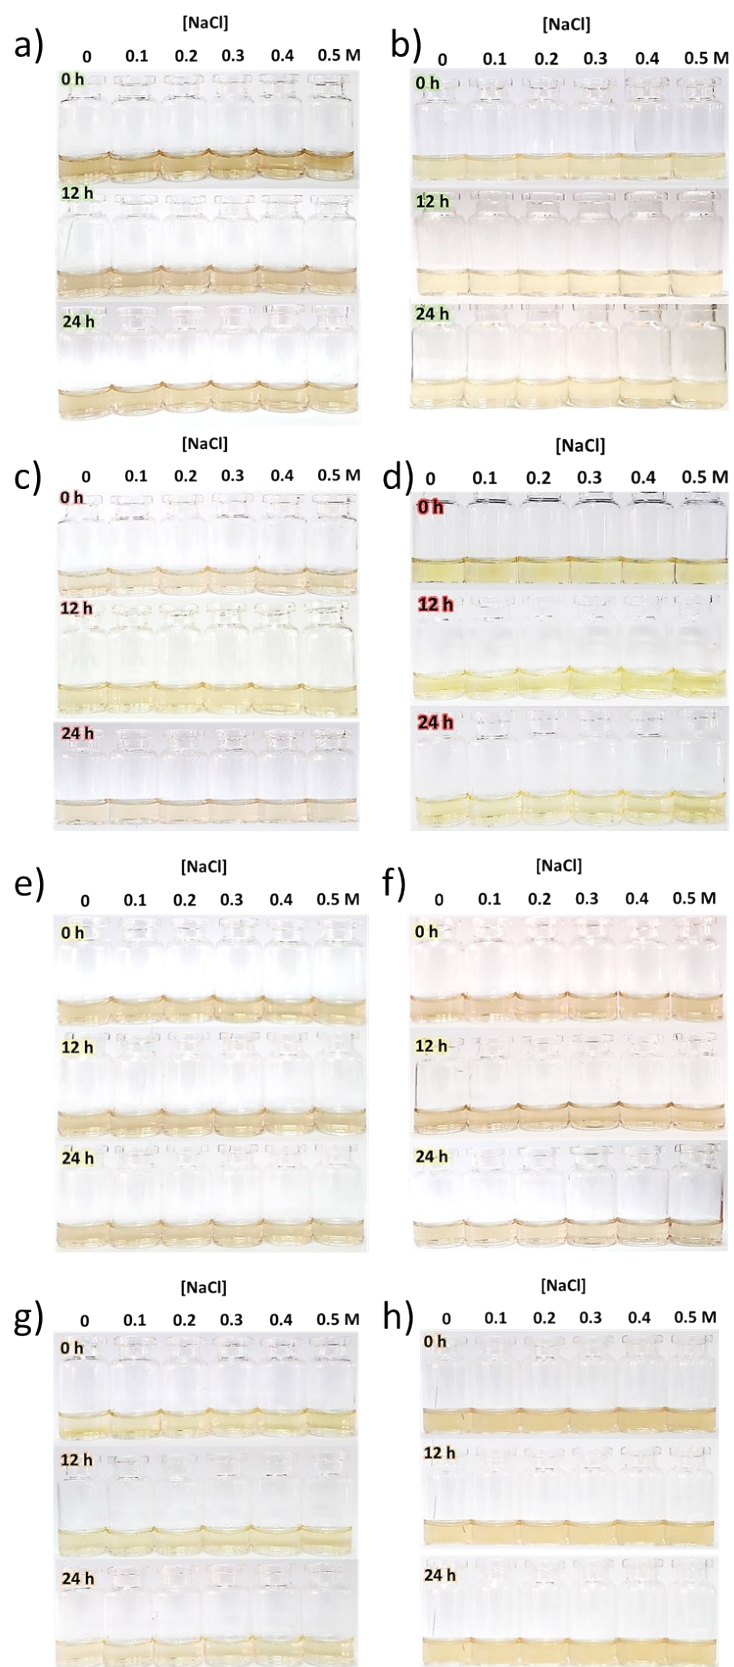

**Fig. S6** Stability images of (a) B-CDs1, (b) B-CDs2, (c) N-CDs1, (d) N-CDs2, (e) S-CDs1, (f) S-CDs2, (g) P-CDs1, and (h) P-CDs2 at varied NaCl concentration.



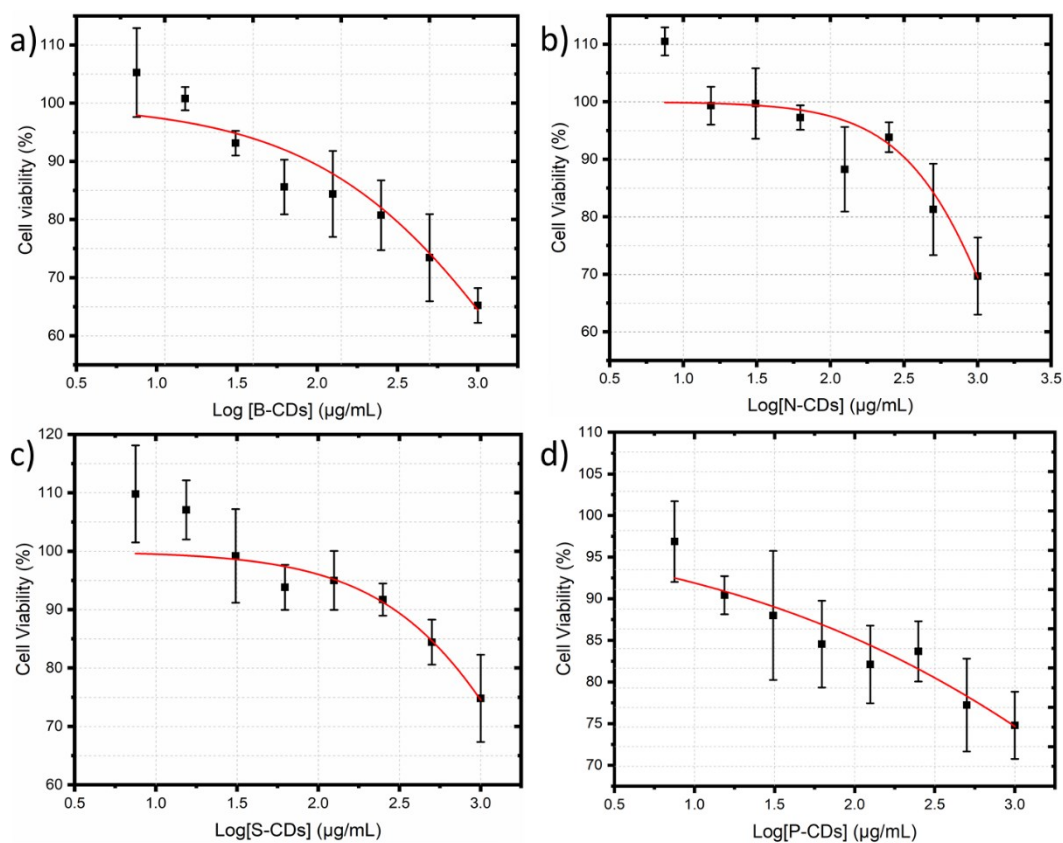

**Fig. S7** Cell viability plot of HeLa cancer cells after 24 h incubation (a) B-CDs1, (b) N-CDs1, (c) S-CDs1, and (d) P-CDs1 by the microwave-assisted method.  $CC_{50}$  values were plotted on the red fitted curves resulted from doses response mode on Origin software. All data showed as mean  $\pm$  SD with  $n=3$ .

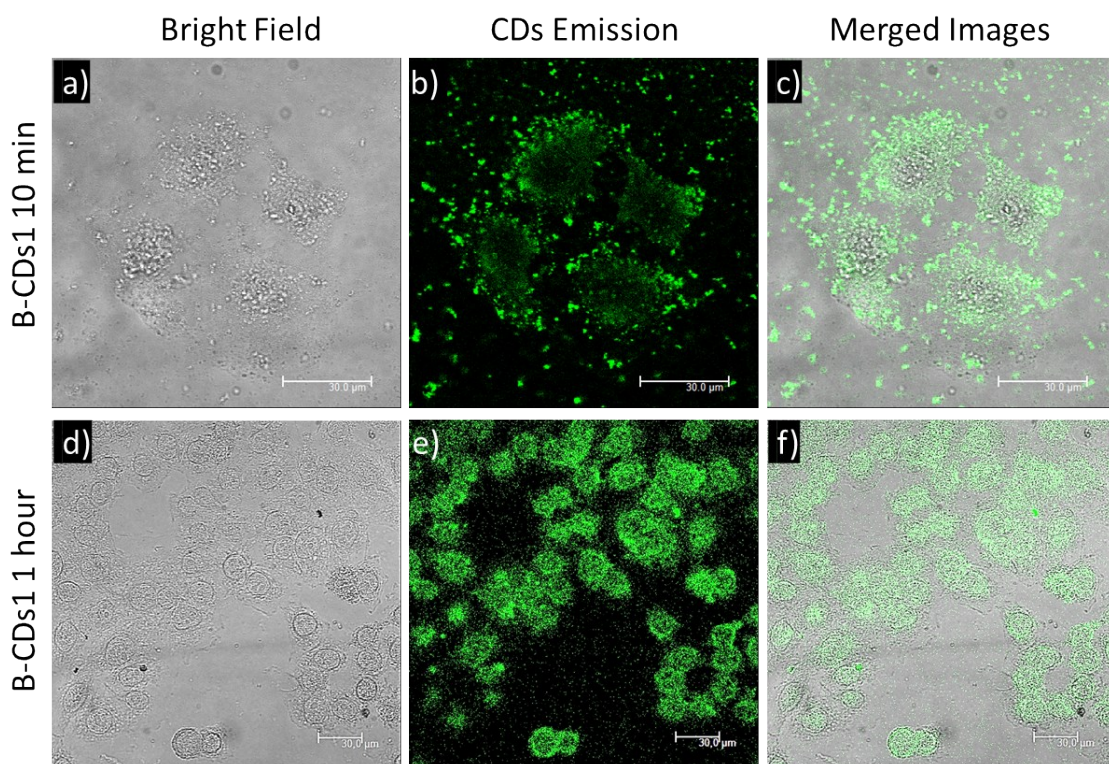

**Fig. S8** Photograph CLSM images of HeLa cells after 10 min (a-c) and 1 h (d-f) incubation with B-CDs1.

**Table S1.** Summary of CDs data from various carbon source and its QY.

| Carbon source                                                    | Method       | Doping | Size (nm) | Color    | Emission (nm) | QY (%) | Ref.                          |
|------------------------------------------------------------------|--------------|--------|-----------|----------|---------------|--------|-------------------------------|
| Polythiophene derivatives                                        | Hydrothermal | N, S   | 2-6       | Red      | 680           | 5.4    | <sup>1</sup> and <sup>2</sup> |
| Citric acid, formamide                                           | Microwave    | N      | 4         | Red      | 640           | 22.9   | <sup>3</sup>                  |
| Pulp-free lemon juice                                            | Solvothermal | N      | 4.6       | Red      | 631           | 28     | <sup>4</sup>                  |
| Citric acid, ethanediamine, formamide                            | Solvothermal | N      | 4.1       | Red      | 627           | 53     | <sup>5</sup>                  |
| N,N-Dimethyl-, N,N-diethyl-, and N,N-dipropyl-p-phenylenediamine | Solvothermal | N      | 1-2       | Red      | 637, 642, 645 | 86     | <sup>6</sup>                  |
| Citric acid, urea, sodium fluoride                               | Microwave    | N, F   | 10        | Red      | 600           | 1.2    | <sup>7</sup>                  |
| Pulp-free lemon juice, formamide                                 | Solvothermal | N      | 5.7       | Deep-Red | 704           | 31     | <sup>8</sup>                  |
| Citric acid, urea                                                | Hydrothermal | N      | 8.4       | Red      | 550           | 54.3   | <sup>9</sup>                  |
| sodium citrate, sodium thiosulfate                               | Hydrothermal | S      | 4.6       | Blue     | 440           | 67     | <sup>10</sup>                 |
| Peach gum polysaccharide (PGP), ethylenediamine                  | Hydrothermal | N      | 2–5       | Blue     | 445           | 28.46  | <sup>11</sup>                 |
| Citric acid, thiourea, boric acid                                | Microwave    | B,N,S  | 3.5       | Blue     | 450           | 25.8   | <sup>12</sup>                 |
| Citric acid, boric acid (B-CDs1)                                 | Furnace      | B      | 8.63      | Blue     | 440           | 31.92  | Present study                 |
| Citric acid, nitric acid (N-CDs1)                                | Furnace      | N      | 7.47      | Blue     | 440           | 31.44  | Present study                 |
| Citric acid, sulphuric acid (S-CDs1)                             | Furnace      | S      | 8.97      | Blue     | 440           | 31.3   | Present study                 |
| Citric acid, phosphoric acid (P-CDs1)                            | Furnace      | P      | 7.60      | Blue     | 440           | 31.37  | Present study                 |
| Citric acid, boric acid (B-CDs2)                                 | Microwave    | B      | 9.35      | Blue     | 455           | 32.96  | Present study                 |
| Citric acid, nitric acid (N-CDs2)                                | Microwave    | N      | 9.11      | Blue     | 467           | 32.49  | Present study                 |
| Citric acid, sulphuric acid (S-CDs2)                             | Microwave    | S      | 8.06      | Blue     | 410           | 32.59  | Present study                 |
| Citric acid, phosphoric acid (P-CDs2)                            | Microwave    | P      | 5.04      | Blue     | 410           | 32.09  | Present study                 |



**Table S2.** The relative amount of elements in B-CDs2 by XPS analysis.

| <b>Regions</b> | <b>Position (eV)</b> | <b>FWHM</b> | <b>Area</b> | <b>Amount (%)</b> |
|----------------|----------------------|-------------|-------------|-------------------|
| <b>C 1s</b>    | 532.0                | 5.306       | 13512.80    | 56.85             |
| <b>O 1s</b>    | 284.6                | 6.995       | 6615.56     | 39.63             |
| <b>B 1s</b>    | 193.0                | 3.891       | 198.87      | 3.52              |

**Table S3.** Summary Data of CDs and its CC<sub>50</sub> values

| CDs type        | Cell model | Assays          | Incubation time [h] | CC <sub>50</sub> | Reference     |
|-----------------|------------|-----------------|---------------------|------------------|---------------|
|                 | NIH 3T3    |                 |                     | 580 µg/mL        |               |
| CDP             | A549       | MTT             | 24                  | 408 µg/mL        | 13            |
|                 | HCT-15     |                 |                     | 413 µg/mL        |               |
| Gd-CDs          | NCI-H446   | MTT             | 24                  | 6.28 mg/mL       | 14            |
| Gd-CDs          | U87MG      | MTT             | 24                  | 33.10 µg/mL      | 15            |
| N-GQDs          | trypsin    | soybean trypsin | 1                   | 1.31 µg/mL       | 16            |
| Cu-NCDs         | HepG2      | MTT             | 6                   | 812.96 µg/mL     | 17            |
| GQDs            | HepG2      | MTT             | 24                  | 12 µg/mL         | 18            |
| GQD-VO(p-dmada) | MDCK       | MTS             | 48                  | 62.20 µM         | 19            |
|                 | HepG2      |                 |                     | 231.7 µM         |               |
| Ox-bCD NP       | RAW264.7   | MTT             | 12                  | >1000 µg/mL      | 20            |
| β-CD-CDs        | 293T       | MTT             | 24                  | 4.8 µg/mL        | 21            |
| DPP CDs         |            |                 |                     | 820 µg/mL        | 22            |
| CTS CDs         | HepG2      | MTT             | 12                  | 1318 µg/mL       |               |
| B-CDs1          | HeLa       | CCK-8           | 1                   | 5289.15 µg/mL    | Present Study |
| N-CDs1          | HeLa       | CCK-8           | 1                   | 9217.56 µg/mL    | Present Study |
| S-CDs1          | HeLa       | CCK-8           | 1                   | 3725.18 µg/mL    | Present Study |
| P-CDs1          | HeLa       | CCK-8           | 1                   | 6710.52 µg/mL    | Present Study |
| B-CDs2          | HeLa       | CCK-8           | 1                   | 2444.72 µg/mL    | Present Study |
| N-CDs2          | HeLa       | CCK-8           | 1                   | 1945.04 µg/mL    | Present Study |
| S-CDs2          | HeLa       | CCK-8           | 1                   | 3218.58 µg/mL    | Present Study |
| P-CDs2          | HeLa       | CCK-8           | 1                   | 40318.13 µg/mL   | Present Study |

## References

1. J. Ge, M. Lan, B. Zhou, W. Liu, L. Guo, H. Wang, Q. Jia, G. Niu, X. Huang and H. Zhou, *Nature communications*, 2014, **5**, 1-8.
2. L. Guo, J. Ge, W. Liu, G. Niu, Q. Jia, H. Wang and P. Wang, *Nanoscale*, 2016, **8**, 729-734.
3. S. Sun, L. Zhang, K. Jiang, A. Wu and H. Lin, *Chemistry of Materials*, 2016, **28**, 8659-8668.
4. H. Ding, Y. Ji, J.-S. Wei, Q.-Y. Gao, Z.-Y. Zhou and H.-M. Xiong, *J. Mater. Chem. B*, 2017, **5**, 5272-5277.
5. H. Ding, J.-S. Wei, N. Zhong, Q.-Y. Gao and H.-M. Xiong, *Langmuir*, 2017, **33**, 12635-12642.
6. H. Jia, Z. Wang, T. Yuan, F. Yuan, X. Li, Y. Li, Z. a. Tan, L. Fan and S. Yang, *Advanced Science*, 2019, **6**, 1900397.
7. W. Yang, H. Zhang, J. Lai, X. Peng, Y. Hu, W. Gu and L. Ye, *Carbon*, 2018, **128**, 78-85.
8. H. Ding, X. Zhou, B. Qin, Z. Zhou and Y. Zhao, *Journal of Luminescence*, 2019, **211**, 298-304.
9. T. Ogi, K. Aishima, F. A. Permatasari, F. Iskandar, E. Tanabe and K. Okuyama, *New Journal of Chemistry*, 2016, **40**, 5555-5561.
10. Q. Xu, P. Pu, J. Zhao, C. Dong, C. Gao, Y. Chen, J. Chen, Y. Liu and H. Zhou, *J. Mater. Chem. A*, 2015, **3**, 542-546.
11. J. Liao, Z. Cheng and L. Zhou, *ACS Sustainable Chemistry & Engineering*, 2016, **4**, 3053-3061.
12. A. Pal, K. Ahmad, D. Dutta and A. Chattopadhyay, *ChemPhysChem*, 2019, **20** 1018-1027.
13. T. Pal, S. Mohiyuddin and G. Packirisamy, *ACS Omega*, 2018, **3**, 831-843.
14. H. Liao, Z. Wang, S. Chen, H. Wu, X. Ma and M. Tan, *RSC Adv.*, 2015, **5**, 66575-66581.
15. H. Chen, G. D. Wang, X. Sun, T. Todd, F. Zhang, J. Xie and B. Shen, *Advanced Functional Materials*, 2016, **26**, 3973-3982.
16. D. Su, M. Wang, Q. Liu, Z. Qu and X. Su, *New Journal of Chemistry*, 2018, **42**, 17083-17090.
17. Y. Liu, P. Wu, X. Wu, C. Ma, S. Luo, M. Xu, W. Li and S. Liu, *Talanta*, 2020, **210**, 120649.
18. R. Gokhale and P. Singh, *Particle & Particle Systems Characterization*, 2014, **31**, 433-438.
19. J. Du, B. Feng, Y. Dong, M. Zhao and X. Yang, *Nanoscale*, 2020, **12**, 9219-9230.
20. D. Z. Y. Wei, K. Chen, X. Zhang, X. Xu, Q. Shi, S. Han, X. Chen, H. Gong, X. Li and J. Zhang, *Advanced Healthcare Materials*, 2014, **4**, 69-76.
21. M. Luo, Y. Hua, Y. Liang, J. Han, D. Liu, W. Zhao and P. Wang, *Biosensors and Bioelectronics*, 2017, **98**, 195-201.
22. H. He, X. Zheng, S. Liu, M. Zheng, Z. Xie, Y. Wang, M. Yu and X. Shuai, *Nanoscale*, 2018, **10**, 10991-10998.
